# Supplementary material for: Two Distinct Yersinia pestis Populations Causing Plague among Humans in the West Nile Region of Uganda
Source: PubMed Central journal article supplement (PMC4750964; doi:10.1371/journal.pntd.0004360), 2016-02-11
Supplement: pntd.0004360.s001.pdf [file pntd.0004360.s001.pdf]

S1 Table. Melt-MAMA primer sequences.

| Melt-MAMA Primer (5'→ 3') |                            |                                            |                           |
|---------------------------|----------------------------|--------------------------------------------|---------------------------|
| CO92 Gene                 | Ancestral                  | Derived                                    | Common                    |
| <b>ypo3237</b>            | GATTTTCATCGCATAAGCTACG     | CGGCGGCGGGCGGCGGGATTTTCATCGCATAAGCTCCA     | AGCAGTTGTCGGTGTTCGT       |
| <b>ypo1821</b>            | ATCACCAACCCGCTCCCA         | CGGCGGCGGGCGGCGGATCACCAACCCGCTCTCG         | CGGCGGTTGGGGTTTG          |
| <b>ypo2837</b>            | CCCTGTTTGCTGAACGTATG       | CGGCGGCGGGCGGCGGCCCTGTTTGCTGAACGTCTA       | GATAACCTCGGCGGCAC         |
| <b>ypo1016</b>            | GGCATTGCATGGCACTTC         | CGGCGGCGGGCGGCGGGGCATTGCATGGCACCTA         | GAGCGACCCAAGCGGA          |
| <b>ypo3726</b>            | GCTCGTCTTGTTGTTGTAATGCT    | CGGCGGCGGGCGGCGGCGCTCGTCTTGTTGTTGTAATCCG   | CGCAGAGCGTTTTTGATCG       |
| <b>ypo3098</b>            | CATTTTTTGCACATACTGTAACCT   | CGGCGGCGGGCGGCGGCATTTTTTGCACATACTGTAACCTC  | CCCTATCTGATATTGTAGAAACCTT |
| <b>ypo3878</b>            | TAACCTTGTTTTGACAGGAAAAGAC  | GCCGCCGCCGCCGCCGTAACCTTGTTTTGACAGGAAAATAA  | AACCTTGAGACATAGGCGCGA     |
| <b>ypo0829</b>            | GCATTTTCATCCGGGGAT         | CGGCGGCGGGCGGCGGCATTTTCATCCGGGCAG          | GGCTCAGGCCGTAGTAC         |
| <b>ypo0064</b>            | AAATTCATAAAGATTAATGTATCCCT | GCCGCCGCCGCCGGCGAAATTCATAAAGATTAATGTATCGCC | AACCAACCGTGATTCAAGCAA     |
