# Supplementary material for: Two Distinct Yersinia pestis Populations Causing Plague among Humans in the West Nile Region of Uganda
Source: PubMed Central journal article supplement (PMC4750964; doi:10.1371/journal.pntd.0004360), 2016-02-11
Supplement: pntd.0004360.s002.pdf [file pntd.0004360.s002.pdf]

S2 Table. SNP and VNTR data.

| Strain    | SNP <sup>a</sup> |         |         |                |         |         |         |         |         | SNP Group | 18-locus VNTR |     |     |     |     |     |     |     |     |     |     |     |     |     | MLVA Group |     |     |     |     |
|-----------|------------------|---------|---------|----------------|---------|---------|---------|---------|---------|-----------|---------------|-----|-----|-----|-----|-----|-----|-----|-----|-----|-----|-----|-----|-----|------------|-----|-----|-----|-----|
|           | ypo3237          | ypo1821 | ypo2837 | ypo1016        | ypo3726 | ypo3098 | ypo3878 | ypo0829 | ypo0064 |           | M68           | M23 | M22 | M21 | M12 | M18 | M24 | M33 | M34 | M31 | M19 | M28 | M59 | M58 |            | M29 | M79 | M25 | M27 |
| UG13-0810 | G                | A       | A       | - <sup>b</sup> | T       | T       | A       | G       | C       | 1         | 0             | -1  | -1  | 2   | 5   | 2   | -3  | 4   | 7   | 3   | -17 | -3  | -1  | -3  | -4         | -6  | -13 | 1   | I   |
| UG13-0823 | G                | A       | A       | - <sup>b</sup> | T       | T       | A       | G       | C       | 1         | 0             | -1  | -1  | 2   | 5   | 2   | -3  | 4   | 7   | 3   | -17 | -3  | -1  | -3  | -4         | -6  | -13 | 0   | I   |
| UG09-2321 | G                | A       | A       | A              | T       | T       | A       | G       | C       | 1         | 0             | -1  | -1  | 2   | 5   | 3   | -3  | 4   | 7   | 3   | -15 | -3  | -1  | -3  | -4         | -6  | -13 | 3   | I   |
| UG12-0355 | G                | A       | A       | - <sup>b</sup> | T       | T       | A       | G       | C       | 1         | 0             | -1  | 2   | 3   | 4   | 2   | -3  | 4   | 7   | 4   | -17 | -3  | -1  | -3  | -4         | -6  | -13 | 0   | I   |
| UG12-1759 | G                | A       | A       | A              | T       | T       | A       | G       | C       | 1         | 0             | -2  | -1  | 2   | 4   | 2   | -3  | 4   | 7   | 3   | -17 | -2  | -1  | -3  | -4         | -5  | -12 | 1   | I   |
| UG09-2236 | G                | A       | A       | A              | T       | T       | A       | G       | C       | 1         | 0             | -1  | 0   | -1  | 5   | 3   | -3  | 4   | 7   | 2   | -16 | -3  | -1  | -3  | -4         | -6  | -12 | 2   | I   |
| UG09-2239 | G                | A       | A       | A              | T       | T       | A       | G       | C       | 1         | 0             | -1  | 0   | -1  | 5   | 3   | -3  | 4   | 7   | 2   | -16 | -3  | -1  | -3  | -4         | -6  | -12 | 2   | I   |
| UG09-2242 | G                | A       | A       | A              | T       | T       | A       | G       | C       | 1         | 0             | -1  | 0   | -1  | 5   | 3   | -3  | 4   | 7   | 2   | -16 | -3  | -1  | -3  | -4         | -6  | -12 | 2   | I   |
| UG09-2253 | G                | A       | A       | A              | T       | T       | A       | G       | C       | 1         | 0             | -1  | 0   | -1  | 5   | 3   | -3  | 4   | 7   | 2   | -16 | -3  | -1  | -3  | -4         | -6  | -12 | 2   | I   |
| UG09-2258 | G                | A       | A       | A              | T       | T       | A       | G       | C       | 1         | 0             | -1  | 0   | -1  | 5   | 3   | -3  | 4   | 7   | 2   | -16 | -3  | -1  | -3  | -4         | -6  | -12 | 2   | I   |
| UG09-2353 | G                | A       | A       | A              | T       | T       | A       | G       | C       | 1         | 0             | -1  | 0   | -1  | 5   | 3   | -3  | 4   | 7   | 2   | -16 | -3  | -1  | -3  | -4         | -6  | -12 | 2   | I   |
| UG09-2248 | G                | A       | A       | A              | T       | T       | A       | G       | C       | 1         | 0             | -1  | 0   | -1  | 5   | 3   | -3  | 4   | 5   | 2   | -16 | -3  | -1  | -3  | -4         | -6  | -12 | 2   | I   |
| UG09-2251 | G                | A       | A       | A              | T       | T       | A       | G       | C       | 1         | 0             | -1  | 0   | -1  | 5   | 3   | -3  | 4   | 7   | 2   | -16 | -3  | -1  | -3  | -4         | -6  | -12 | 3   | I   |
| UG09-2316 | G                | A       | A       | A              | T       | T       | A       | G       | C       | 1         | 0             | -1  | 0   | 3   | 5   | 3   | -3  | 4   | 7   | 2   | -16 | -3  | -1  | -3  | -4         | -6  | -12 | 0   | I   |
| UG05-0454 | G                | A       | A       | A              | T       | T       | A       | T       | T       | 1         | 0             | -1  | 0   | 2   | 5   | 4   | -3  | 4   | 7   | 3   | -16 | -2  | -1  | -3  | -4         | -6  | -12 | 0   | I   |
| UG09-2255 | G                | A       | A       | A              | T       | T       | A       | G       | C       | 1         | 0             | -1  | 0   | 2   | 4   | 3   | -3  | 4   | 6   | 1   | -16 | -3  | -1  | -3  | -4         | -6  | -11 | 0   | I   |
| UG09-1790 | G                | A       | A       | A              | T       | T       | A       | G       | C       | 1         | 0             | -1  | 1   | 2   | 5   | 3   | -3  | 4   | 8   | 3   | -16 | -3  | -1  | -3  | -5         | -6  | -11 | 2   | I   |
| UG09-1799 | G                | A       | A       | A              | T       | T       | A       | G       | C       | 1         | 0             | -1  | 1   | 2   | 5   | 3   | -3  | 4   | 8   | 3   | -16 | -3  | -1  | -3  | -5         | -6  | -11 | 2   | I   |
| UG09-1747 | G                | A       | A       | A              | T       | T       | A       | G       | C       | 1         | 0             | -1  | 1   | 2   | 4   | 3   | -3  | 4   | 8   | 3   | -16 | -3  | -1  | -3  | -5         | -6  | -12 | 1   | I   |
| UG09-1787 | G                | A       | A       | A              | T       | T       | A       | G       | C       | 1         | 0             | -1  | 1   | 0   | 5   | 3   | -3  | 4   | 7   | 2   | -16 | -3  | -1  | -3  | -5         | -6  | -11 | 7   | I   |
| UG09-1819 | G                | A       | A       | A              | T       | T       | A       | G       | C       | 1         | 0             | -1  | 1   | 2   | 7   | 1   | -3  | 4   | 8   | 1   | -15 | -3  | -1  | -3  | -4         | -7  | -12 | 1   | I   |
| UG09-2298 | G                | A       | A       | A              | T       | T       | A       | G       | C       | 1         | 0             | -1  | 1   | 3   | 3   | 1   | -3  | 4   | 5   | 1   | -16 | -2  | -1  | -3  | -4         | -7  | -12 | 0   | I   |
| UG09-2100 | G                | A       | A       | A              | G       | C       | C       | G       | C       | 2         | 0             | 3   | 2   | 1   | 4   | 8   | -3  | 4   | 5   | 2   | -12 | -3  | -1  | -3  | -4         | -6  | -9  | -3  | II  |
| UG09-2280 | G                | A       | A       | A              | G       | C       | C       | G       | C       | 2         | 0             | 3   | 2   | 1   | 4   | 8   | -3  | 4   | 5   | 3   | -12 | -3  | -1  | -3  | -4         | -6  | -9  | -3  | II  |
| UG09-2264 | G                | A       | A       | A              | G       | C       | C       | G       | C       | 2         | 0             | 5   | 2   | 1   | 5   | 6   | -3  | 4   | 4   | 2   | -12 | -3  | -1  | -3  | -4         | -6  | -9  | 0   | II  |
| UG12-0325 | G                | A       | A       | A              | G       | C       | C       | G       | C       | 2         | 0             | 4   | 1   | 0   | 2   | 8   | -3  | 4   | 5   | 3   | -13 | -3  | -1  | -3  | -4         | -6  | -9  | -2  | II  |
| UG12-0334 | G                | A       | A       | A              | G       | C       | C       | G       | C       | 2         | 0             | 1   | 1   | 0   | 2   | 4   | -3  | 4   | 5   | 4   | -14 | -3  | -1  | -3  | -4         | -6  | -9  | -3  | II  |
| UG09-1817 | G                | A       | A       | A              | G       | C       | C       | G       | C       | 2         | 0             | 5   | 2   | 0   | 2   | 9   | -3  | 4   | 1   | 2   | -14 | -3  | -1  | -3  | -4         | -6  | -9  | -5  | II  |
| UG09-2234 | G                | A       | A       | A              | G       | C       | C       | G       | C       | 2         | 0             | 6   | 4   | 1   | 0   | 6   | -3  | 4   | 3   | 2   | -13 | -3  | -1  | -3  | -4         | -6  | -9  | -5  | II  |
| UG09-2324 | G                | A       | A       | A              | G       | C       | C       | G       | C       | 2         | 0             | 6   | 4   | 1   | 0   | 6   | -3  | 4   | 3   | 2   | -13 | -3  | -1  | -3  | -4         | -7  | -9  | -5  | II  |
| UG09-2334 | G                | A       | A       | A              | G       | C       | C       | G       | C       | 2         | 0             | 6   | 4   | 1   | 0   | 6   | -3  | 4   | 3   | 2   | -13 | -3  | -1  | -3  | -4         | -6  | -9  | -4  | II  |
| UG09-2232 | G                | A       | A       | A              | G       | C       | C       | G       | C       | 2         | 0             | 6   | 4   | 1   | 3   | 5   | -3  | 4   | 3   | 2   | -13 | -3  | -1  | -3  | -4         | -6  | -9  | -5  | II  |
| UG09-1925 | G                | A       | A       | A              | G       | C       | C       | G       | C       | 2         | 0             | 3   | 4   | 0   | 3   | 3   | -3  | 4   | 3   | 2   | -13 | -3  | -1  | -3  | -4         | -6  | -9  | -5  | II  |
| UG13-0818 | G                | A       | A       | A              | G       | C       | C       | G       | C       | 2         | 0             | 5   | 2   | 1   | 0   | 7   | -3  | 4   | 3   | 2   | -13 | -3  | -1  | -3  | -4         | -6  | -10 | -6  | II  |
| UG09-1910 | G                | A       | A       | A              | G       | C       | C       | G       | C       | 2         | 0             | 4   | 3   | 1   | 3   | 6   | -3  | 4   | 3   | 2   | -15 | -3  | -1  | -3  | -4         | -6  | -10 | -4  | II  |
| UG09-2299 | G                | A       | A       | A              | G       | C       | C       | G       | C       | 2         | 0             | 4   | 3   | 1   | 3   | 6   | -3  | 4   | 3   | 2   | -15 | -3  | -1  | -3  | -4         | -6  | -10 | -5  | II  |
| UG09-1869 | G                | A       | A       | A              | G       | C       | C       | G       | C       | 2         | 0             | 5   | 3   | 1   | 3   | 6   | -3  | 4   | 3   | 1   | -13 | -3  | -1  | -3  | -4         | -6  | -8  | -4  | II  |
| UG09-1885 | G                | A       | A       | A              | G       | C       | C       | G       | C       | 2         | 0             | 4   | 3   | 2   | 1   | 11  | -3  | 4   | 4   | 1   | -16 | -3  | -1  | -3  | -4         | -6  | -9  | -5  | II  |
| UG09-2304 | G                | A       | A       | A              | G       | C       | C       | G       | C       | 2         | 0             | 4   | 3   | 2   | 0   | 11  | -3  | 4   | 4   | 2   | -16 | -3  | -1  | -3  | -4         | -6  | -9  | -5  | II  |
| UG05-0487 | G                | A       | A       | A              | G       | C       | C       | G       | C       | 2         | 0             | 4   | 3   | 2   | 1   | 9   | -3  | 4   | 4   | 2   | -14 | -3  | -1  | -3  | -4         | -6  | -9  | -5  | II  |
| UG09-2245 | G                | A       | A       | A              | G       | C       | C       | G       | C       | 2         | 0             | 4   | 3   | 1   | 0   | 7   | -3  | 4   | 3   | 2   | -16 | -3  | -1  | -3  | -4         | -6  | -9  | -5  | II  |
| UG09-2259 | G                | A       | A       | A              | G       | C       | C       | G       | C       | 2         | 0             | 4   | 3   | 1   | 0   | 7   | -3  | 4   | 3   | 2   | -16 | -3  | -1  | -3  | -4         | -6  | -9  | -5  | II  |
| UG09-2260 | G                | A       | A       | A              | G       | C       | C       | G       | C       | 2         | 0             | 4   | 3   | 1   | 0   | 7   | -3  | 4   | 3   | 2   | -16 | -3  | -1  | -3  | -4         | -6  | -9  | -5  | II  |
| UG09-1808 | G                | A       | A       | A              | G       | C       | C       | G       | C       | 2         | 0             | 2   | 3   | 1   | 1   | 7   | -3  | 4   | 3   | 2   | -16 | -3  | -1  | -3  | -4         | -6  | -9  | -5  | II  |
| UG09-2273 | G                | A       | A       | A              | G       | C       | C       | G       | C       | 2         | 0             | 2   | 3   | 1   | 1   | 7   | -3  | 4   | 3   | 2   | -16 | -3  | -1  | -3  | -4         | -6  | -9  | -5  | II  |
| UG05-0494 | G                | A       | A       | A              | G       | C       | C       | G       | C       | 2         | 0             | 3   | 3   | 1   | 1   | 6   | -3  | 4   | 4   | 2   | -17 | -3  | -1  | -3  | -4         | -6  | -9  | -5  | II  |
| UG09-1845 | G                | A       | A       | A              | G       | C       | C       | G       | C       | 2         | 0             | 5   | 3   | 1   | -1  | 7   | -3  | 4   | 5   | 0   | -13 | -3  | -1  | -3  | -4         | -6  | -9  | -5  | II  |
| UG09-1831 | G                | A       | A       | A              | G       | C       | C       | G       | C       | 2         | 0             | 3   | 3   | 1   | 3   | 5   | -3  | 4   | 4   | 1   | -14 | -3  | -1  | -3  | -4         | -6  | -8  | -5  | II  |
| UG09-1998 | G                | A       | A       | A              | G       | C       | C       | G       | C       | 2         | 0             | 3   | 3   | 1   | 3   | 5   | -3  | 4   | 4   | 1   | -14 | -3  | -1  | -3  | -4         | -6  | -8  | -5  | II  |
| UG05-0452 | G                | A       | A       | A              | G       | C       | C       | G       | C       | 2         | 0             | 3   | 1   | 1   | 3   | 5   | -3  | 4   | 2   | 2   | -14 | -3  | -1  | -3  | -4         | -6  | -9  | 0   | II  |
| UG09-2014 | G                | A       | A       | A              | G       | C       | C       | G       | C       | 2         | 0             | 4   | 3   | 1   | 2   | 9   | -3  | 4   | 4   | 0   | -12 | -3  | -1  | -3  | -4         | -6  | -9  | -4  | II  |
| UG09-2276 | G                | A       | A       | A              | G       | C       | C       | G       | C       | 2         | 0             | 4   | 3   | 1   | 2   | 9   | -3  | 4   | 4   | 0   | -12 | -3  | -1  | -3  | -4         | -6  | -9  | -5  | II  |
| UG09-1859 | G                | A       | A       | A              | G       | C       | C       | G       | C       | 2         | 0             | 4   | 3   | 2   | 2   | 9   | -3  | 4   | 4   | -1  | -12 | -3  | -1  | -3  | -4         | -6  | -9  | -4  | II  |
| UG09-2270 | G                | A       | A       | A              | G       | C       | C       | G       | C       | 2         | 0             | 4   | 3   | 2   | 2   | 9   | -3  | 4   | 4   | -1  | -12 | -3  | -1  | -3  | -4         | -6  | -9  | -4  | II  |
| UG09-2312 | G                | A       | A       | A              | G       | C       | C       | G       | C       | 2         | 0             | 4   | 3   | 2   | 2   | 9   | -3  | 4   | 4   | -1  | -12 | -3  | -1  | -3  | -4         | -6  | -9  | -4  | II  |
| UG13-0821 | G                | A       | A       | A              | G       | C       | C       | G       | C       | 2         | 0             | 4   | 0   | 1   | 2   | 9   | -3  | 4   | 3   | 0   | -14 | -3  | -2  | -3  | -4         | -6  | -9  | -5  | II  |
| UG05-0517 | G                | A       | A       | A              | G       | C       | C       | G       | C       | 2         | -1            | 2   | 3   | 2   | 2   | 9   | -3  | 4   | 3   | 2   | -16 | -3  | -1  | -3  | -4         | -6  | -9  | -4  | II  |
| UG13-0807 | G                | A       | A       | A              | G       | C       | C       | G       | C       | 2         | 0             | 1   | 3   | 2   | 1   | 9   | -3  | 4   | 2   | 1   | -16 | -3  | -1  | -3  | -4         | -6  | -8  | -6  | II  |
| UG09-2063 | G                | A       | A       | A              | G       | C       | C       | G       | C       | 2         | 0             | 3   | 7   | 2   | 2   | 8   | -3  | 4   | 3   | 4   | -14 | -3  | -1  | -3  | -4         | -4  | -9  | -3  | II  |
| UG09-2214 | G                | A       | A       | A              | G       | C       | C       | G       | C       | 2         | 0             | 3   | 7   | 2   | 2   | 7   | -3  | 4   | 3   | 5   | -14 | -3  | -1  | -3  | -4         | -4  | -9  | -3  | II  |
| UG12-1764 | G                | A       | A       | A              | G       | C       | C       | G       | C       | 2         | 0             | 3   | 0   | 1   | 2   | 10  | -3  | 4   | 3   | 1   | -13 | -3  | -1  | -4  | -4         | -5  | -9  | -6  | II  |

<sup>a</sup>CO92 gene.<sup>b</sup>This SNP could not be amplified from 3 strains.
